# Supplementary material for: Minimal prevalence of Huntington’s disease in the South of Brazil and instability of the expanded CAG tract during intergenerational transmissions
Source: PubMed Central journal article supplement (PMC6726154; doi:10.1590/1678-4685-gmb-2018-0032), 2019-06-27
Supplement: 1415-4757-GMB-1678-4685-GMB-2018-0032-20190515-suppl.pdf [file 1415-4757-GMB-1678-4685-GMB-2018-0032-20190515-suppl.pdf]

**Supplementary Material to "Minimal prevalence of Huntington's disease in the South of Brazil and instability of the expanded CAG tract during intergenerational transmissions"**

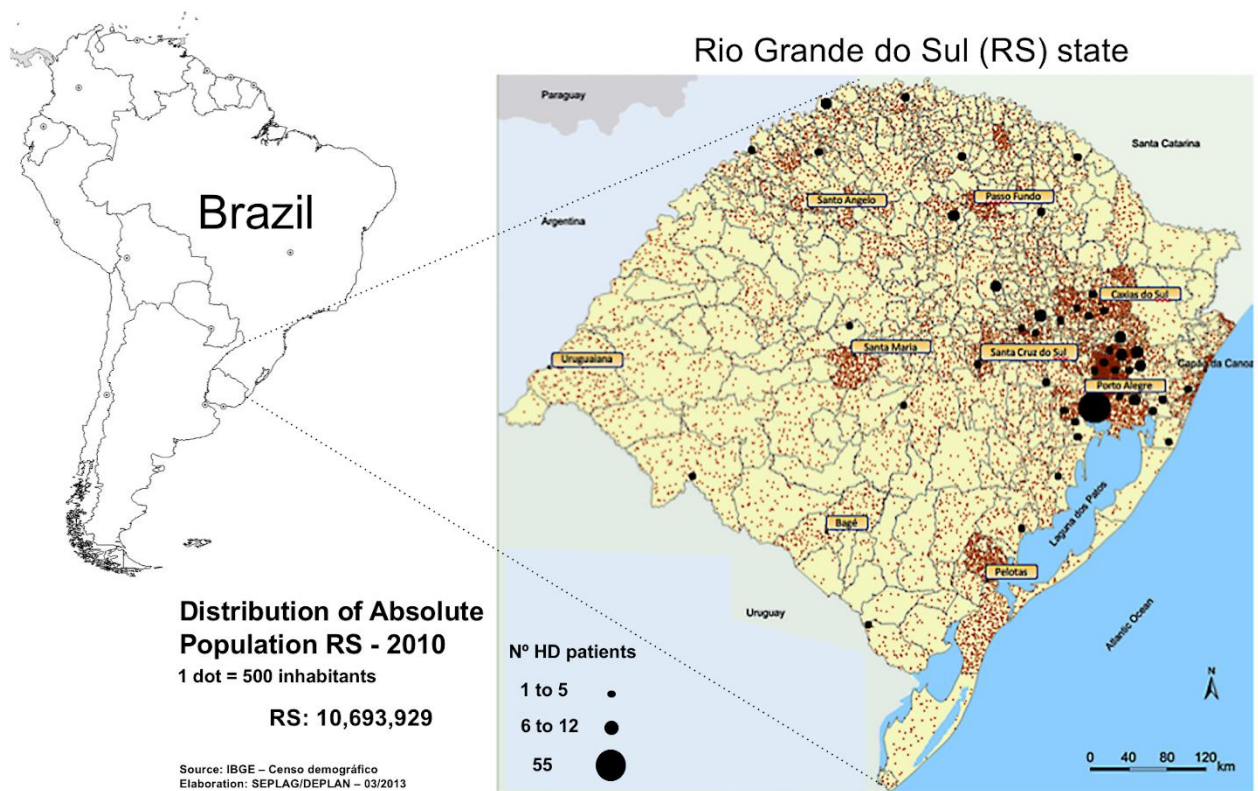

**Figure S1** - Origin of HD families from Rio Grande do Sul, compared with absolute numbers of inhabitants.
